# Supplementary material
Source: PubMed Central journal article supplement (PMC7990661)
Supplement: mmc1.pdf [file mmc1.pdf]

## Supporting Online Information

**REGULATION OF IRF-3-DEPENDENT INNATE IMMUNITY BY THE PAPAIN-LIKE PROTEASE DOMAIN OF THE SARS CORONAVIRUS**

Santhana G. Devaraj, Nan Wang, Zhongbin Chen, Zihong Chen, Monica Tseng, Naina Barretto, Rongtuan Lin, Clarence J. Peters, Chien-Te K. Tseng, Susan C. Baker, Kui Li.

**1. Humanized cDNA sequence of SARS CoV PLpro core domain.**

Bam HI and EcoRI restriction sites were added to both 5' and 3' ends of the cDNA for cloning into pcDNA 3.1-V5/His B. Kozak sequence and start codon were added to 5' end for efficient translation in eukaryotic cells.

**ggatcc**actATGGAGGTGAAGACCATCAAGGTGTTCCACCACCGTGGACAACACCAACCTG  
CACACCCAGCTGGTGGACATGAGCATGACCTACGGCCAGCAGTTCGGCCCCACCTACCTG  
GACGGCGCCGACGTGACCAAGATCAAGCCCCACGTGAACCACGAGGGCAAGACCTTCTTC  
GTGCTGCCCAGCGACGACACCCTGCGGAGCGAGGCCCTTCGAGTACTACCACACCCTGGAC  
GAGAGCTTCTGGGCAGATACATGAGCGCCCTGAACCACACCAAGAAGTGGAAGTTCCCC  
CAAGTCGGCGGCCTGACCAGCATCAAGTGGGCCGACAACAACCTGCTACCTGAGCAGCGTG  
CTGCTGGCCCTGCAGCAGCTGGAAGTCAAGTTCAACGCCCCCGCCCTGCAAGAGGCCTAC  
TACCGGGCCAGGGCCGGCGACGCCGCAACTTCTGCGCCCTGATCCTGGCCTACTCCAAC  
AAGACCGTGGGCGAGCTGGGCGACGTGCGGGAGACCATGACCCACCTGCTGCAGCACGCC  
AACCTGGAGAGCGCCAAGCGGGTGTGAACGTGGTGTGCAAGCACTGCGGCCAGAAGACC  
ACCACCCTGACCGGCGTGGAGGCCGTGATGTACATGGGCACCCTGAGCTACGACAACCTG  
AAGACCGGGGTGACGATCCCCTGCGTGTGCGGCCGGGACGCCACCCAGTACCTGGTGCAG  
CAGGAGAGCAGCTTCGTGATGATGAGCGCCCCCCCCGCGAGTACAAGCTGCAGCAGGGC  
ACCTTCCTGTGCGCCAACGAGTACACCGGCAACTACCAGTGCGGCCACTACACCCACATC  
ACCGCCAAGGAGACCTGTACCGGATCGACGGCGCCACCTGACCAAGATGAGCGAGTAC  
AAGGGCCCCGTGACCGACGTGTTCTACAAGGAGACCAGCTACACCACCACCATCAAGTGG  
**aattc**

**2. Primers for site-directed mutagenesis of SARS-CoV PLpro.**

| Mutant          | Primers | Oligonucleotide sequence (5' to 3')                   |
|-----------------|---------|-------------------------------------------------------|
| PLpro<br>C1651A | P1      | 5' GCC GAC AAC AAC GCC TAC CTG AGC AGC 3'             |
|                 | P2      | 5' GCT GCT CAG GTA GGC GTT GTT GTC GGC 3'             |
| PLpro<br>D1826A | P1      | 5' CGG ATC GCT GGC GCC CAC CTG ACC AAG ATG AGC GAG 3' |
|                 | P2      | 5' GGC GCC AGC GAT CCG GTA CAG GGT CTC CTT GGC GG 3'  |

Devaraj et al, Suppl. Fig.1

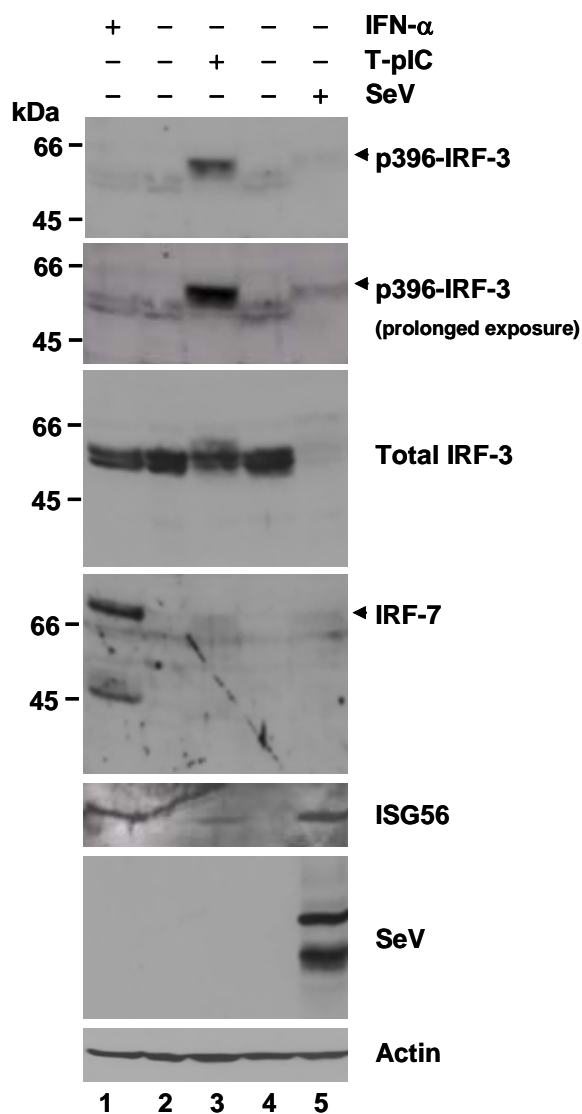

**Supplemental Fig.1.** MA104 cells grown in 35-mm dishes were treated with 1000 IU/ml of recombinant human IFN- $\alpha$ 2b for 24 h (lane 1), mock-treated (lane 2 and 4), transfected with 5  $\mu$ g poly (I-C) (T-pIC, lane 3) for 8 h, or infected with 100 HAU/ml of SeV for 8 h (lane 5), prior to cell lysis and immunoblot analysis of p396-IRF3, IRF-3, IRF-7, ISG56, SeV, or actin. Note that the p396-IRF3 abundance in SeV-infected cells is much lower than that induced by T-pIC, due to SeV-induced degradation of IRF-3. IRF-7 is not basally expressed in MA104 cells, and its expression is minimally induced by SeV or T-pIC during this short period of treatment (8 h). The MW of IRF-7 is higher than that of p396-IRF3.

## Devaraj et al, Suppl. Fig.2

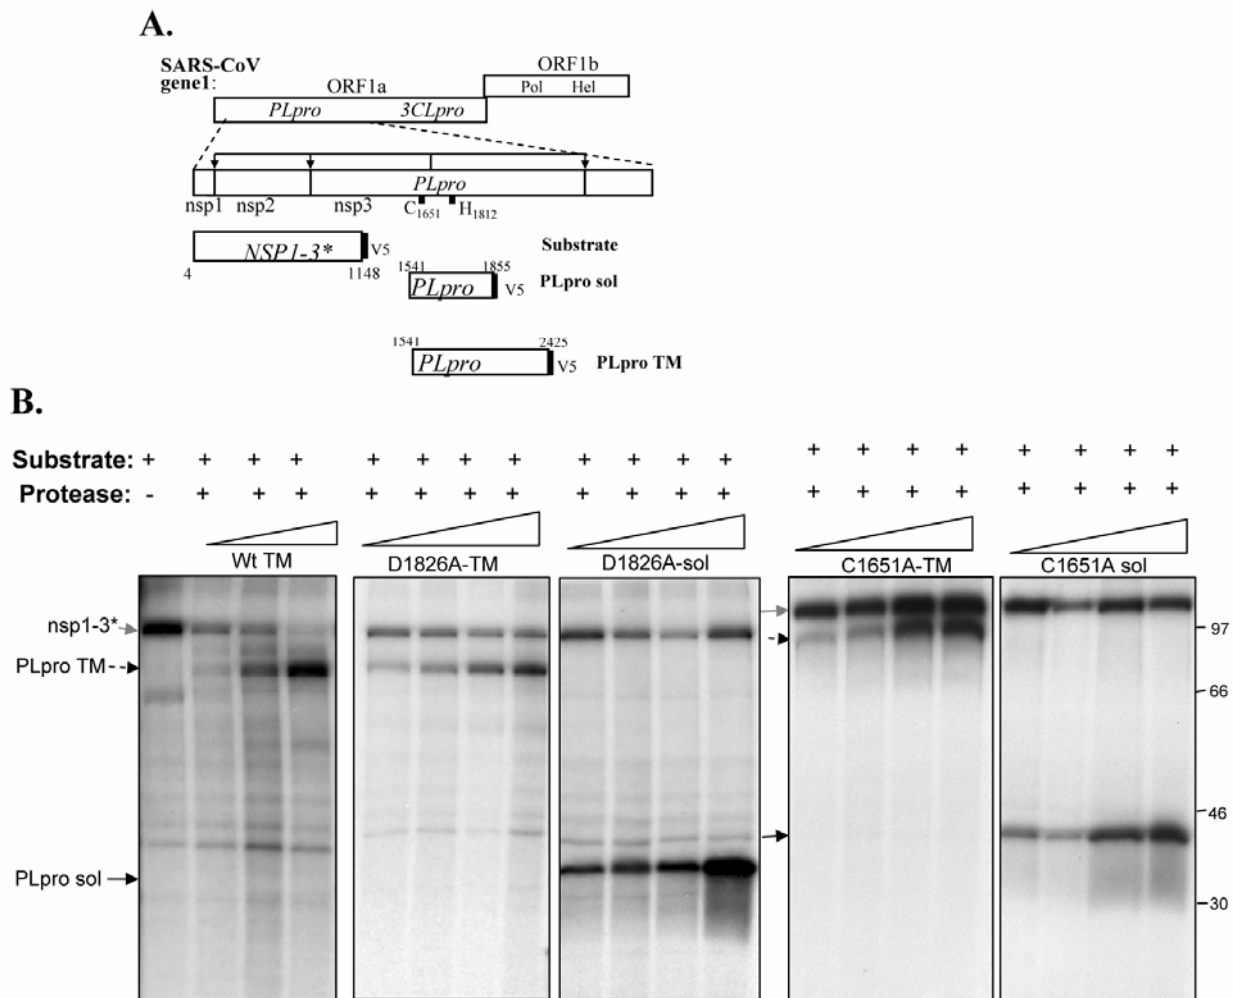**Supplemental Fig.2. Protease activity of various SARS-CoV PLpro mutants.**

A. Schematic diagram of constructs expressing PLpro and substrate NSP1-3\*. The catalytic cysteine, histidine and aspartic acid residues are indicated as are the residues at which they begin and end. Figure adapted from Barretto et al (JVI, 2005).

B. Trans-cleavage assay to assess proteolytic activity of PLpro Wt, D1826A and C1651A mutants. Increasing amounts of soluble (sol) or transmembrane (TM) versions of SARS-CoV PLpro Wt, D1826A or C1651A mutant, were co-expressed along with substrate nsp1-3\*, via vaccinia-driven T7 expression in HeLa cells. The proteins were radiolabeled with Trans-<sup>35</sup>S, immunoprecipitated with anti-V5, which precipitates the uncleaved substrate nsp1-3\* as well as the protease. Products were analyzed by electrophoresis on 10% SDS-polyacrylamide gels and visualized by autoradiography. Positions of substrate nsp1-3\* is indicated by a grey arrow, PLpro TM by a dotted arrow and PLpro sol by a black arrow. Note the disappearance of the nsp1-3 full length substrate for WT but not the D1826A or C1651A mutants.
